# Supplementary material
Source: HighWire-hosted journal article supplement (http://molpharm.aspetjournals.org/highwire/filestream/76939/field_highwire_adjunct_files/0/74732_Supplemental_data_R3.pdf)
Supplement: 74732_Supplemental_data_R3.pdf [file 74732_Supplemental_data_R3.pdf]

**Supplemental data**

**Dietary 9-*cis*- $\beta,\beta$ -carotene fails to rescue vision in mouse models of**

**Leber Congenital Amaurosis**

**Tadao Maeda, Lindsay Perusek, Jaume Amengual, Darwin Babino,**

**Krzysztof Palczewski, and Johannes von Lintig**

**Molecular Pharmacology**

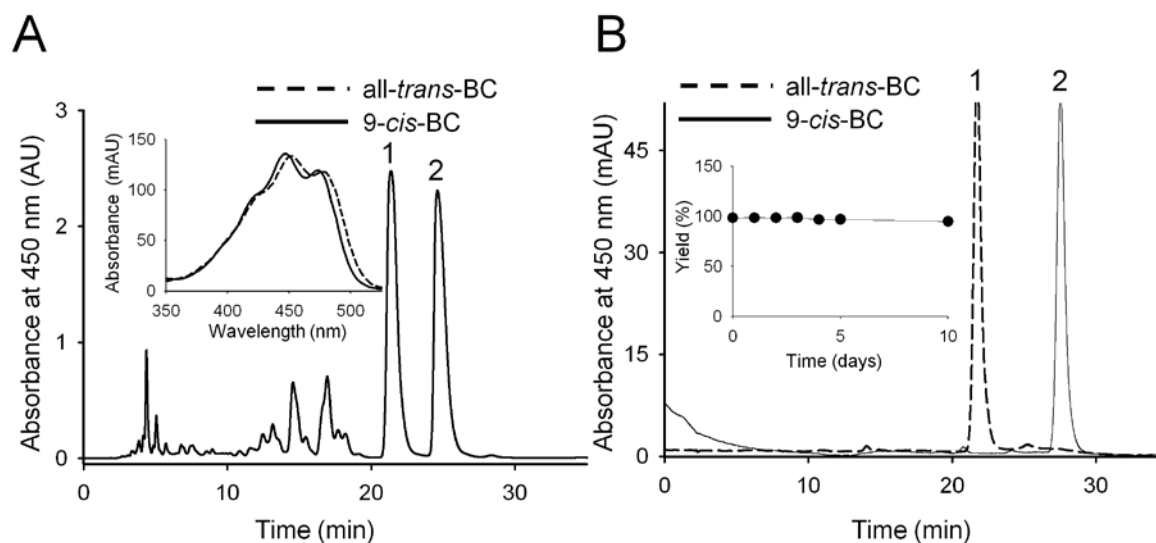

**Figure S1.** HPLC profile of  $\beta,\beta$ -carotene isomers in a  $\beta,\beta$ -carotene-rich powder of the alga *Dunaliella bardawil*.

Samples from a  $\beta,\beta$ -carotene-rich powder of the alga *Dunaliella bardawil* were extracted with hexane. Extracts were analyzed on a C30 column with MeOH/ methyl *tert*-butyl ether (TBME) (75%/25%) at a flow rate of 1.4 ml/min and analyzed at a wavelength of 450 nm.  $\beta,\beta$ - Carotene isomers [peak 1, all-*trans*- $\beta,\beta$ -carotene (all-*trans*-BC); peak 2, 9-*cis*- $\beta,\beta$ -carotene (9-*cis*-BC)] were separated (A) and the specific absorbance spectra of each isomer was determined (A inset). Each purified isomer was re-chromatographed under the same normal phase HPLC conditions (B, all-*trans*-BC, peak 1; 9-*cis*-BC, peak 2). The stability of 9-*cis*-BC was monitored 10 days after being stored at -80 °C and more than 98% was recovered (B inset).
